# Supplementary material for: Primary Feline Tauopathy: Clinical, Morphological, Immunohistochemical, and Genetic Studies
Source: MDPI journal article supplement (doi:10.3390/ani13182985), 2023-09-21
Supplement: s1 [file s1]

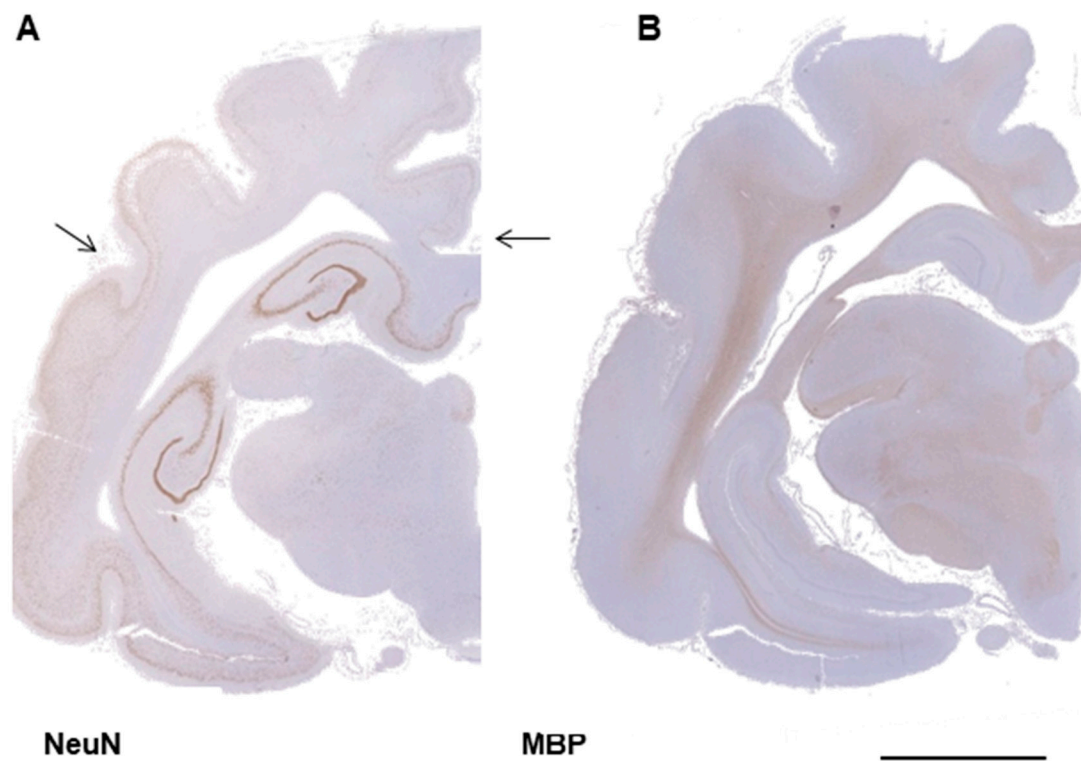

**Figure S1.** Coronal sections of the telencephalon at the level of the thalamus showing neuron loss, as revealed with the neuronal marker NeuN (A) in the cortical region between thin arrows, and myelin pallor in the subcortical white matter of the parietal lobe, as seen with myelin basic protein (MBP) immunohistochemistry (B). Paraffin sections, bar = 5 mm.

**Table S1.** Read mapping stats for each sample after targeted capturing of the MAPT locus. The sample 19\_S15, in bold, corresponds to the study case.

| Sample        | Counts       | Bases covered | Size locus   | % of coverage | Mean coverage  |
|---------------|--------------|---------------|--------------|---------------|----------------|
| 10_S8         | 23567        | 96937         | 98383        | 0.9853        | 12.4421        |
| 11_S9         | 25278        | 96875         | 98383        | 0.9847        | 14.0865        |
| 13_S10        | 19673        | 96640         | 98383        | 0.9823        | 10.2134        |
| 15_S11        | 15650        | 95391         | 98383        | 0.9696        | 6.9959         |
| 16_S12        | 20405        | 95931         | 98383        | 0.9751        | 8.5969         |
| 17_S13        | 39385        | 97233         | 98383        | 0.9883        | 19.9416        |
| 18_S14        | 36036        | 97133         | 98383        | 0.9873        | 21.8418        |
| <b>19_S15</b> | <b>28011</b> | <b>97026</b>  | <b>98383</b> | <b>0.9862</b> | <b>17.0481</b> |
| 1_S1          | 29050        | 97000         | 98383        | 0.9859        | 16.0283        |
| 2_S2          | 23800        | 96701         | 98383        | 0.9829        | 13.8005        |
| 3_S3          | 30375        | 97031         | 98383        | 0.9863        | 15.6568        |
| 4_S4          | 12773        | 93730         | 98383        | 0.9527        | 5.2694         |
| 5_S16         | 18669        | 95831         | 98383        | 0.9741        | 7.6906         |
| 6_S5          | 3735         | 63526         | 98383        | 0.6457        | 1.3193         |
| 7_S6          | 9622         | 93084         | 98383        | 0.9461        | 4.2409         |
| 9_S7          | 28202        | 97226         | 98383        | 0.9882        | 16.8294        |

**Table S2.** Results of the variant calling performed by GATK and VarDict.

|                   | <b>All samples</b> |             | <b>Case's private variants</b> |             |
|-------------------|--------------------|-------------|--------------------------------|-------------|
|                   | <b>VArDict</b>     | <b>GATK</b> | <b>VArDict</b>                 | <b>GATK</b> |
| <b>5'UTR</b>      | 2                  | 2           | 0                              | 0           |
| <b>exonic</b>     | 33                 | 15          | 0                              | 0           |
| <b>intronic</b>   | 2310               | 1531        | 37*                            | 3           |
| <b>splicing</b>   | 1                  | 1           | 0                              | 0           |
| <b>downstream</b> | 14                 | 11          | 0                              | 0           |
| <b>TOTAL</b>      | <b>2360</b>        | <b>1560</b> | <b>37</b>                      | <b>3</b>    |

\* One position contains a different variant in ENSEMBL
